# Supplementary material for: Depressive Symptomatology as a Predictor of Cognitive Impairment: Evidence from the Korean Longitudinal Study of Aging (KLOSA), 2006–2020
Source: MDPI journal article supplement (doi:10.3390/biomedicines11102713), 2023-10-06
Supplement: s1 [file s1]

# **Depressive Symptomatology as a Predictor of Cognitive Impairment: Evidence from the Korean Longitudinal Study of Aging (KLOSA), 2006–2020**

## **Supplementary Materials**

**Seong-Uk Baek<sup>1,2,3</sup> and Jin-Ha Yoon<sup>2,4,\*</sup>**

<sup>1</sup> Department of Occupational and Environmental Medicine, Severance Hospital, Yonsei University College of Medicine, Seoul 03722, Republic of Korea

<sup>2</sup> The Institute for Occupational Health, Yonsei University College of Medicine, Seoul 03722, Republic of Korea

<sup>3</sup> Graduate School, Yonsei University College of Medicine, Seoul 03722, Republic of Korea

<sup>4</sup> Department of Preventive Medicine, Yonsei University College of Medicine, Seoul 03722, Republic of Korea

\* Correspondence: flyinyou@yuhs.ac

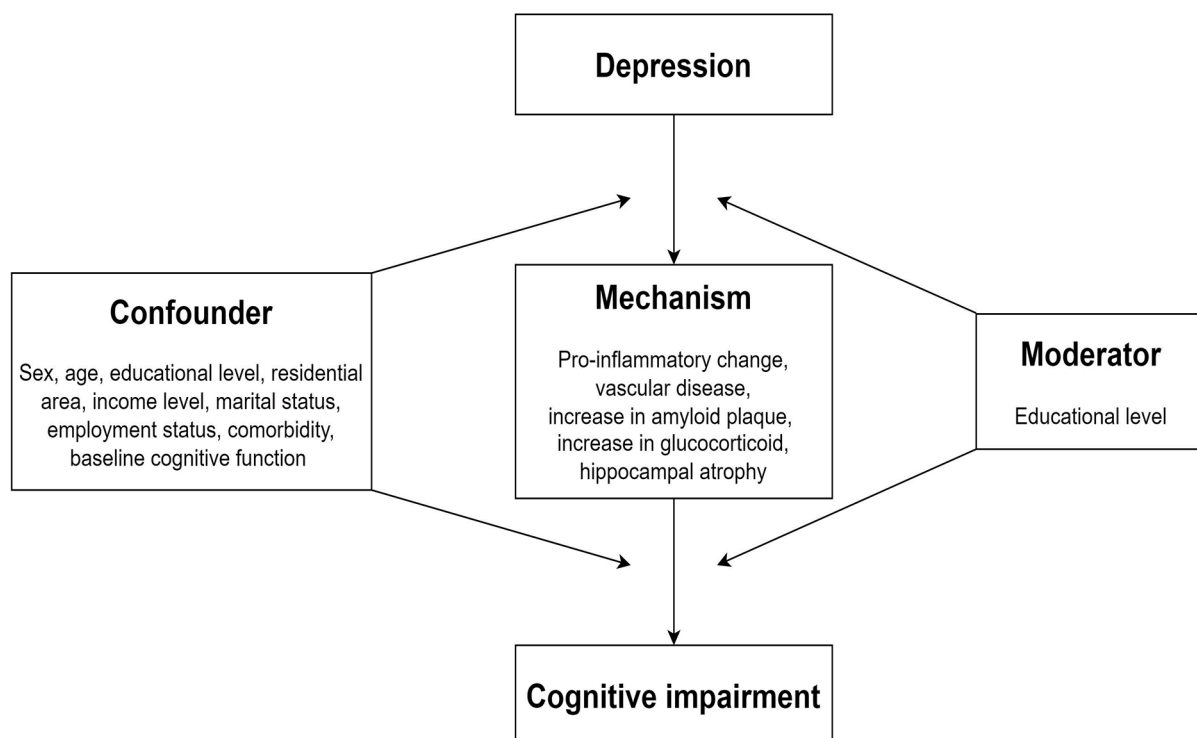

**Figure S1.** Assumed causal relationship between depression and cognitive impairment.

**Table S1.** Sensitivity analysis results based on the imputed datasets (AOR: Adjusted Odds Ratio; CI: Confidence Intervals).

|                            | AOR (95% CI)     | <i>p</i> Value |
|----------------------------|------------------|----------------|
| <b>Overall</b>             | 1.62 (1.49–1.76) | <0.001         |
| <b>Subgroup</b>            |                  |                |
| Elementary school or below | 1.45 (1.29–1.62) | <0.001         |
| Middle school              | 1.68 (1.39–2.03) | <0.001         |
| High school                | 1.83 (1.52–2.22) | <0.001         |
| College or above           | 2.39 (1.67–3.41) | <0.001         |
